# Supplementary material
Source: Springer Nature journal article supplement (https://www.springermedizin.de/resource/supplementary/12874_2008_296_MOESM2_ESM.pdf/9434180)
Supplement: MOESM2 [file 9434180]

**Online search:**

**Excluded by:**

Title or abstract

Full article

**Included:**

Records from PubMed (n=1188)

Excluded (n=975)  
Not drug intervention (n=231)  
Animal or in vitro studies (n=13)  
Not drug vs drug comparison (n=536)  
Not meta-analyses (n=121)  
Non-English language (n=71)  
Also author of this study (n=3)

Excluded (n=174)  
Not drug vs drug comparison (n=105)  
Not meta-analysis (n=62)  
Not drug intervention (n=5)  
Duplets (n=2)

Meta-analyses (n=39)
